# Supplementary material for: Holey reduced graphene oxide nanosheets for high performance room temperature gas sensing
Source: Royal Society of Chemistry journal article supplement (doi:10.1039/c4ta03740e), 2014-08-27
Supplement: c4ta03740e1.pdf [file c4ta03740e1.pdf]

## Supporting Information

### Holey Reduced Graphene Oxide Nanosheets for High Performance Room Temperature Gas Sensing

D. H. Wang,<sup>a</sup> Y. Hu,<sup>a</sup> J. J. Zhao,<sup>a</sup> L. L. Zeng,<sup>a</sup> X. M. Tao<sup>b</sup> and W. Chen<sup>\*,a</sup>,

<sup>a</sup> i-Lab, Suzhou Institute of Nano-Tech and Nano-Bionics, Chinese Academy of Sciences, Suzhou 215123, P. R. China. E-mail: [wchen2006@sinano.ac.cn](mailto:wchen2006@sinano.ac.cn).

<sup>b</sup> Nanotechnology Center, Institute of Textiles and Clothing, The Hong Kong Polytechnic University, Kowloon, Hong Kong SAR, P. R. China

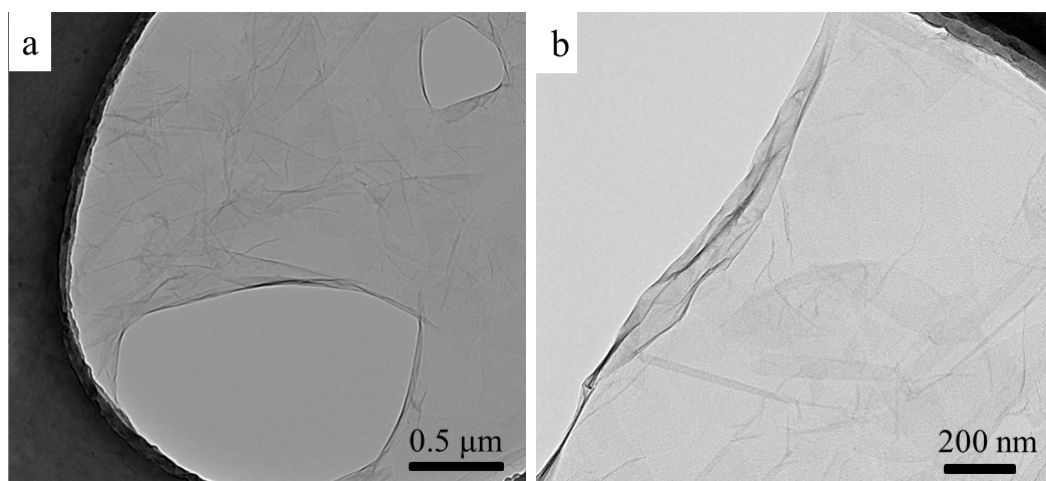

**Figure S1.** TEM images of GO sheets.

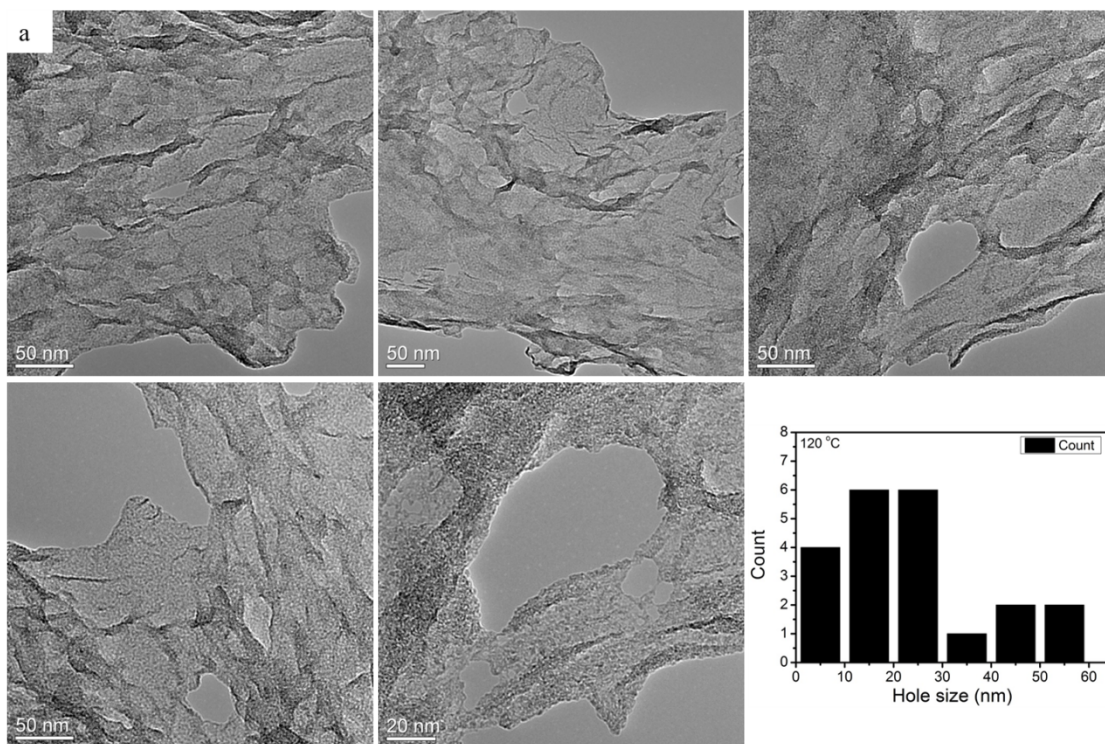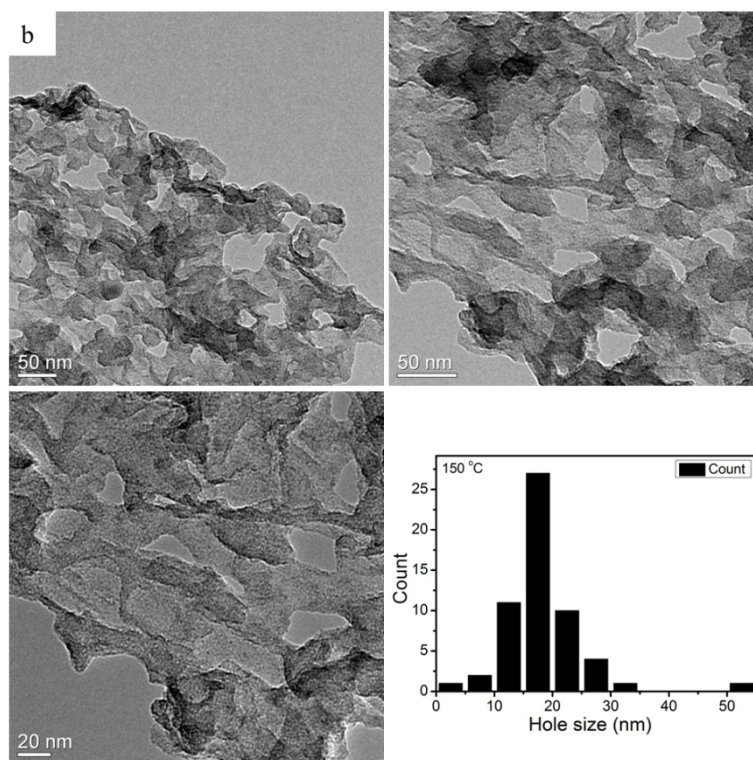

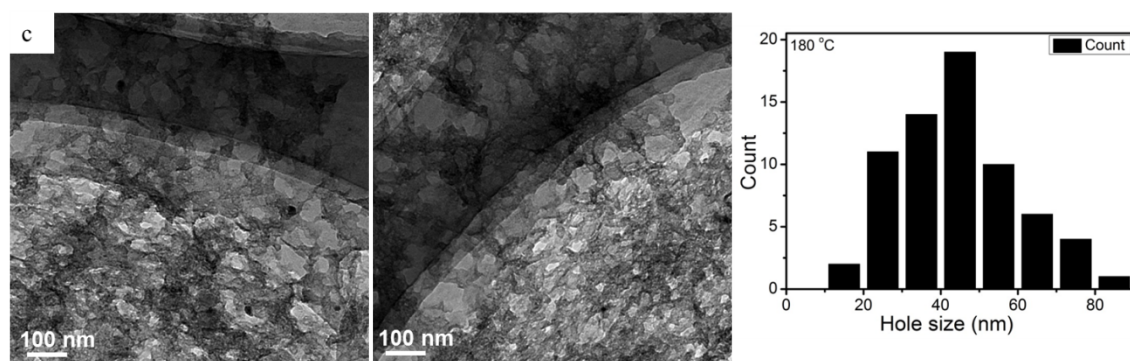

**Figure S2.** TEM images and hole size distribution of RGO 120 °C (a), RGO 150 °C (b) and RGO 180 °C (c), respectively.

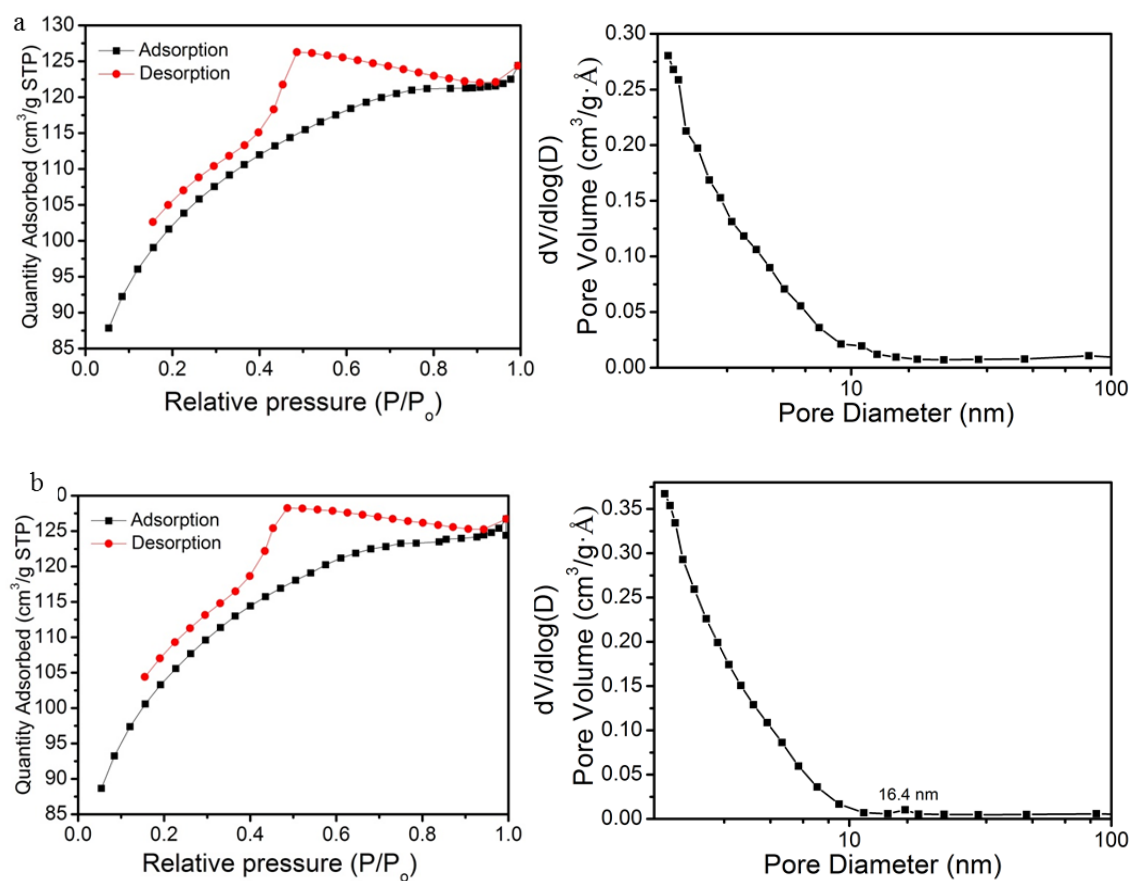

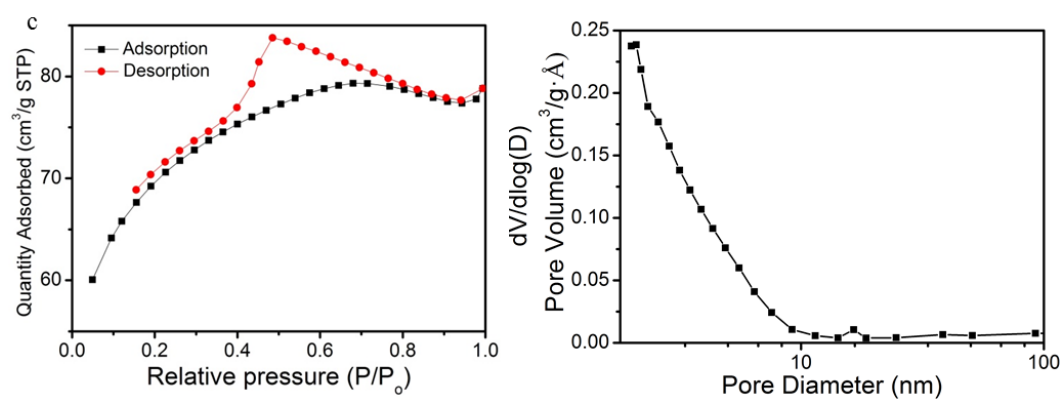

**Figure S3.**  $N_2$  adsorption-desorption isotherms and the BJH Adsorption corresponding pore size distribution curve of RGO under different preparation conditions (a) 120  $^{\circ}C$  6h; (b) 150  $^{\circ}C$  6h; (c) 180  $^{\circ}C$  6h.

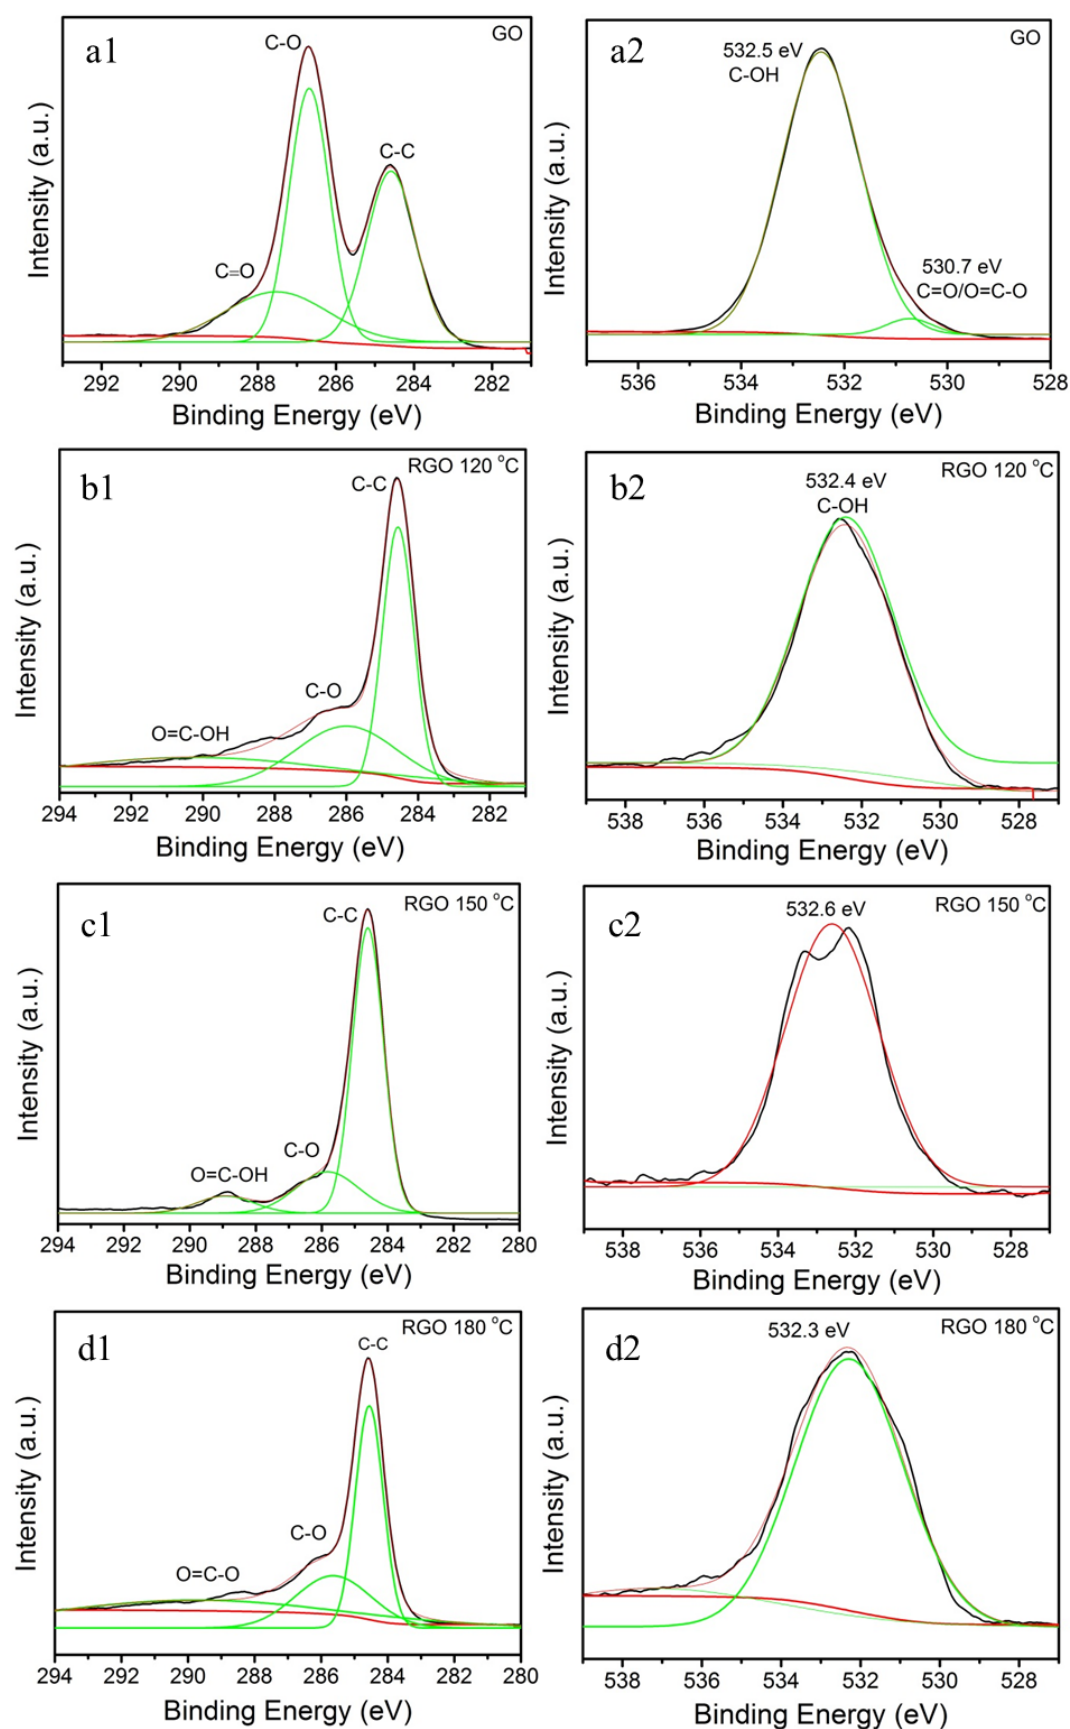

**Figure S4.** XPS C1s (left, 1) spectra and O1s (right, 2) of (a) GO and RGO produced from hydrothermal treatment under different temperature (b) 120 °C, (c) 150 °C, (d)

180 °C. The XPS C 1s spectrum of GO can be fitted into three peaks centered at 284.6 eV, 286.7 eV and 287.5 eV, which could be indexed to the sp<sup>2</sup> hybridized carbon, the carbon in C-O and C=O bonds,<sup>1</sup> respectively. Curve fitting analysis of the XPS C1s spectra of the RGO samples affords three peaks at 284.6 eV (sp<sup>2</sup> C-C), 285.6-286 eV (C-O) and 289.7-290.3 eV (O=C-O), respectively. The fitted O 1s peaks centered at 532-532.6 eV and 530.7 are attributed to the C-OH group and C=O or O=C-O bonds.<sup>2</sup>

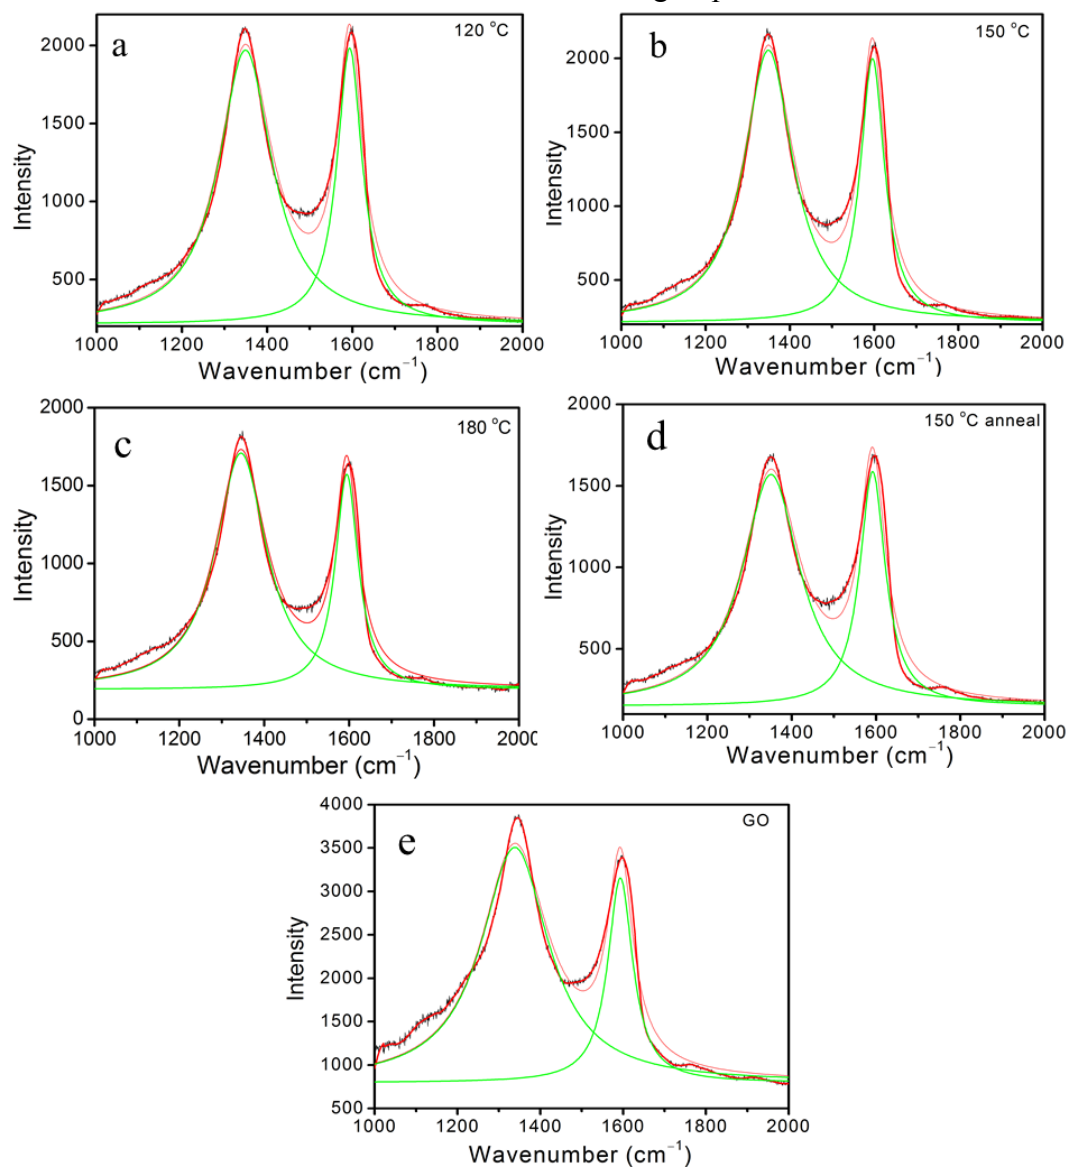

**Figure S5.** Raman spectra of GO, RGO produced from hydrothermal treatment under different temperature (a) 120 °C, (b) 150 °C, (c) 180 °C and RGO annealed at 150 °C for 6h in air.

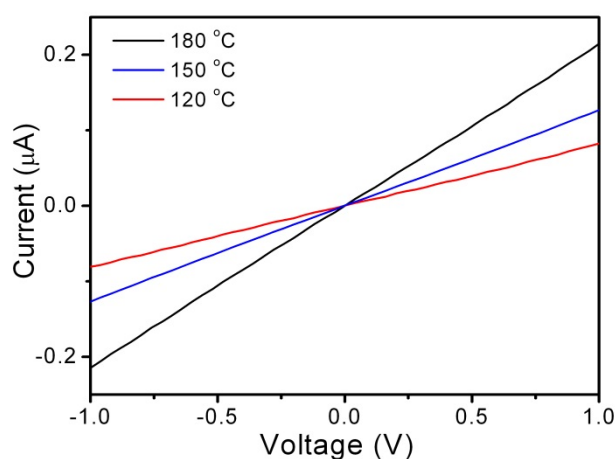

**Figure S6.** Current versus voltage of RGO obtained from hydrothermal treatment with different temperature (120 °C, 150 °C and 180 °C) at ambient condition.

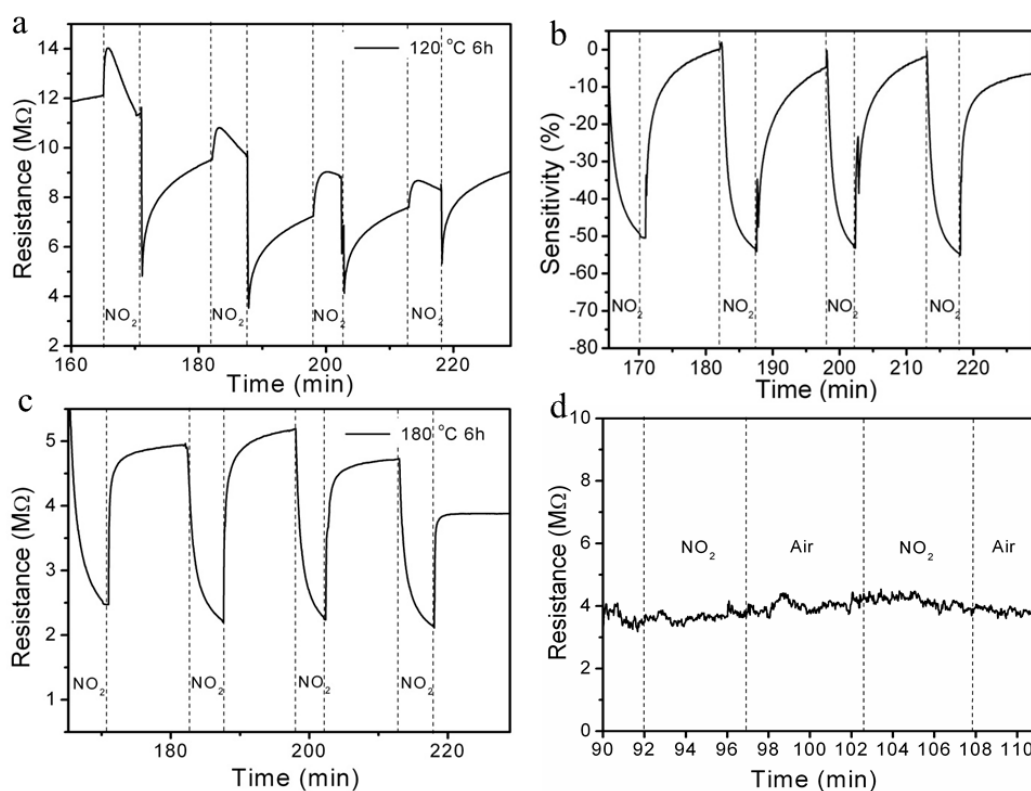

**Figure S7.** Four successive cycles of exposure to 12.5 ppm  $\text{NO}_2$  of the porous RGO fabricated sensor at different preparation temperature: (a) 120 °C, (b) 150 °C and (c) 180 °C; (d) non-porous RGO from anneal at 150 °C for 6h in air.

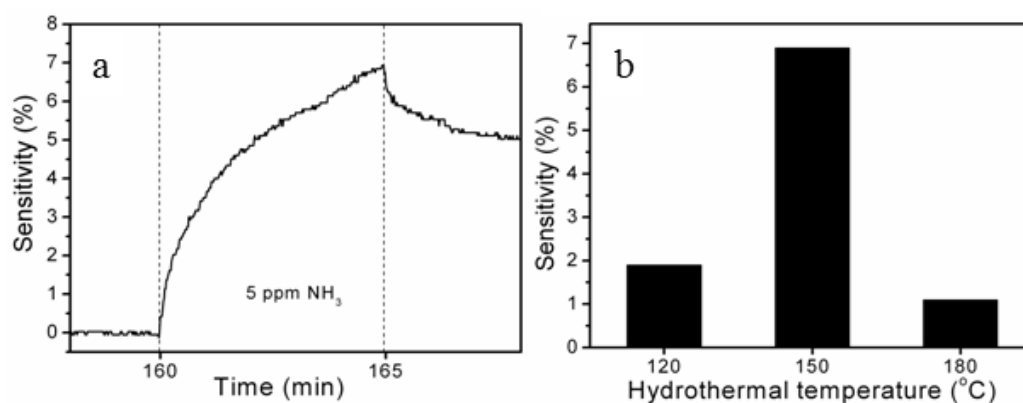

**Figure S8.** (a) Dynamic response of holey RGO 150 °C to 5 ppm  $\text{NH}_3$ ; (b) Sensitivities of RGO prepared at different temperature exposed to 5 ppm  $\text{NH}_3$  for 5 min.

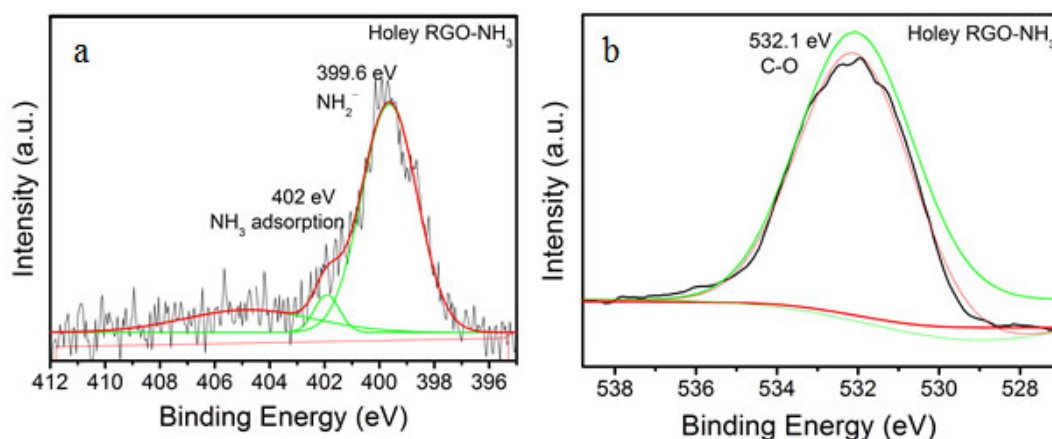

**Figure S9.** XPS N1s spectrum and O 1s spectrum of the holey RGO adsorbed with  $\text{NH}_3$ . The XPS N 1s spectrum of GO can be fitted into two peaks centered at 399.6 eV and 402 eV. The former could be indexed to the  $\text{NH}_2^-$  groups bonded to the negative sites ( $-\text{OH}$ ) on the holey RGO.<sup>3,4</sup> The latter peak is stemmed from the  $\text{NH}_3$  adsorption.<sup>4</sup> This experiment definitely verifies that a measurable fraction of  $\text{NH}_3$  molecules (2.68 atom% of N content based on the XPS data) is strongly binding on the holey RGO even under severe vacuum conditions as the ones imposed by an XPS experiments. Further, compared with the holey RGO (Figure S4c2), a decrease of 0.5 eV is observed. The interaction of  $\text{NH}_3$  molecule to  $-\text{OH}$  on the RGO generates  $\text{H}_2\text{N}-\text{H}-\text{O}-$  bond, this gives rise to an increase in the electron density on O because the electronegativity of O atom is higher than that of N atom, which manifests as a decrease in the O 1s binding energy.<sup>5</sup> In return, the shift confirms that a covalent bond between  $\text{NH}_3$  and  $\text{HO}-$  formed.

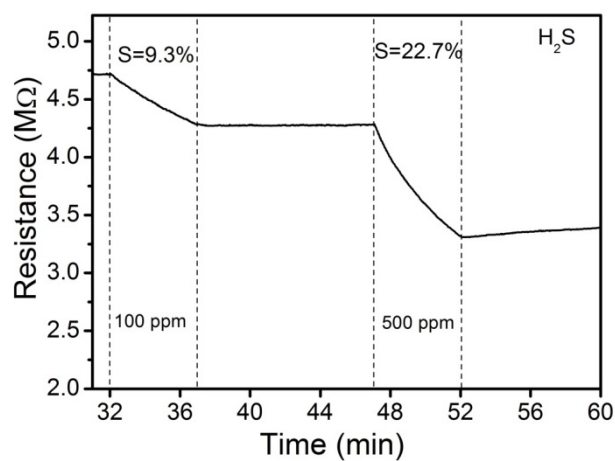

**Figure S10.** Dynamic response of holey RGO 150 °C to 100 ppm and 500 ppm  $\text{H}_2\text{S}$ .

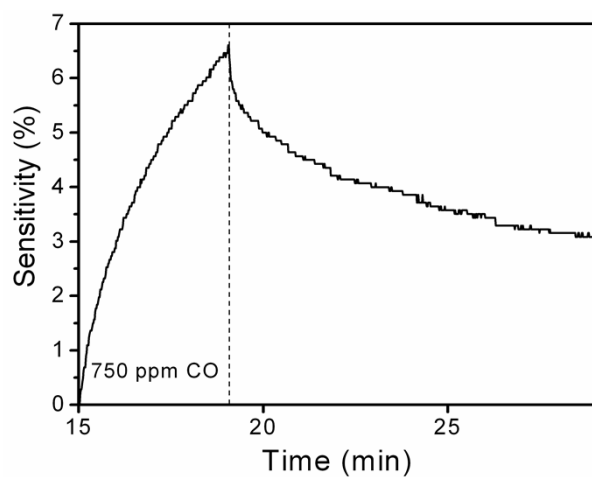

**Figure S11.** Dynamic response of holey RGO 150 °C to 750 ppm CO.

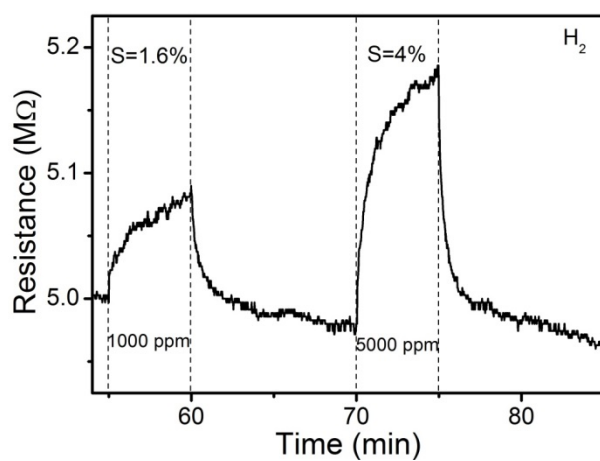

**Figure S12.** Dynamic response of holey RGO 150 °C to 1000 ppm and 5000 ppm  $\text{H}_2$ .

References:

- 1 (a) S. F. Pei and H. M. Cheng, *Carbon*, 2012, **50**, 3210. (b) S. K. Park, S. H. Yu, N. Pinna, S. Woo, B. Jang, Y. H. Chung, Y. H. Cho, Y. E. Sung and Y. Piao, *J. Mater. Chem.*, 2012, **22**, 2520.
- 2 D. Yang, A. Velamakanni, G. Bozoklu, S. Park, M. Stoller, R. D. Piner, S. Stankovich, I. Jung, D. A. Field, C. A. Ventrice Jr. and R. S. Ruoff, *Carbon*, 2009, **47**, 145.
- 3 C. Guimon, A. Gervasini and A. Auroux, *J. Phys. Chem. B*, 2001, **105**, 10316.
- 4 V. Bolis, S. Maggiorini, L. Meda, F. D'Acapito, G. T. Palomino, S. Bordiga and C. Lamberti, *J. Chem. Phys.*, 2000, **113**, 20, 9248.
- 5 D. H. Wang, L. Jia, X. L. Wu, L. Q. Lu and A. W. Xu, *Nanoscale*, 2012, **4**, 576–584.
